1 **TITLE**

2 Designing a brief and simple intervention to help young people with type 1 diabetes to live well:  
3 protocol for developing a novel intervention with participation from young people

4

5 **AUTHORS**

6 Samantha Howland<sup>1\*</sup>¶, Jörg Huber<sup>1&</sup>, Catherine Aicken<sup>1&</sup>

7

8 <sup>1</sup> School of Sport and Health Sciences, University of Brighton, Westlaine House, Village Way, Falmer,  
9 Brighton BN1 9PH, United Kingdom,

10

11 \*Corresponding author

12 Email to: [S.Howland@brighton.ac.uk](mailto:S.Howland@brighton.ac.uk)

13

14 ¶This author has written the protocol for a PhD research project.

15 &These authors have contributed to the work as educational supervisors of S Howland's PhD  
16 research providing oversight and advice on the design.

17

18

19

**NOTE: This preprint reports new research that has not been certified by peer review and should not be used to guide clinical practice.**

20 **METADATA**

21 This research is funded by a studentship to the first author, provided by University of Brighton as  
22 part of its partnership activities with the National Institute for Health Research (NIHR) Applied  
23 Research Collaboration Kent, Surrey, Sussex. The funders did not and will not have a role in study  
24 design, data collection and analysis, decision to publish, or preparation of the manuscript. The views  
25 expressed are those of the authors and not necessarily those of the NHS, the NIHR or the  
26 Department of Health and Social Care.

27 Ethical approval for this study was provided by Cornwall and Plymouth Research Ethics Committee  
28 on behalf of the Health Research Authority and Health and Care Research Wales on 22 Aug 2022  
29 (22/SW/0097). The University of Brighton is the Sponsor (protocol number 2022-9871).

30

31

32 **Competing interests**

33 The authors declare that they have no competing interests.

34

35 **ABSTRACT**

36 Young people living with type 1 diabetes (T1D) navigate daily complex diabetes related tasks as they  
37 take on increasing (and eventually full) responsibility for managing their condition, in addition to  
38 developing their lives as independent adults. Alongside the need for careful day-to-day diabetes  
39 management, the psychosocial burden and mental health impact and stigma are well recognised.  
40 Despite advances in psychological care, many young people with diabetes still experience a greater  
41 mental health burden than those without diabetes. This study aims to develop a brief and simple  
42 intervention for young people with T1D that will support their wellbeing day to day, as required, and

43 grow their ability to live confidently with their condition that requires lifelong meticulous  
44 management. This study will consist of qualitative research and collaboration with young people  
45 with T1D and their siblings, friends, and peers to co-create a testable intervention. In Part 1,  
46 research interviews will be conducted with young people (16-24 years old) with T1D and, where  
47 possible, their siblings/peers to understand the day-to-day challenges of type 1 and what a novel  
48 intervention should address. Thematic analysis of interviews will inform the generation of a  
49 prototype intervention to take into part two, focus group discussions. Focus groups with (i) young  
50 people with T1D and, separately (ii) carers (comprising parents, carers, teachers, specialist nurses).  
51 Collaborative principles will be used to review, redesign and evolve the intervention to meet user  
52 needs. A blend of narrative and thematic analysis will inform the findings and report.

53

54 Insights from Parts 1 and 2 will shape a user-defined and formatively analysed brief and simple  
55 intervention and future study design ready for pilot testing. The aim of this part of the research is to  
56 maximise acceptability and usability of a testable intervention by the target population. To aim of  
57 the future intervention will be to demonstrate effectiveness in helping young adults to live well with  
58 T1D.

59

## 60 **Introduction**

61 It is well recognised that young people transitioning from dependent living as a child or adolescent  
62 to independent living as a young adult experience huge changes within many, if not all, aspects of  
63 their lives (e.g. peer groups, relationships, geographic location, day-to-day activities at school/  
64 college / university / work, emotional development). Those living with type 1 diabetes need to  
65 navigate the added complexity of managing their condition as they take on full responsibility for  
66 their diabetes [1]. Life-altering complications are a significant concern with diabetes and studies  
67 have shown that risk of developing such complications can be reduced by diligent management and  
68 intensive control of blood sugar [2-4]. Regular health review and care is advocated for everyone  
69 with diabetes [5-7] to aid prevention, identification and early intervention of any complications of  
70 disease.

71 Accepting the complexities of “adherence to treatment and regular health-related tasks”  
72 (willingness, ability, intent, confusion, forgetfulness, definition and measurement of success, etc)  
73 more than half of young people with chronic conditions may exhibit so called “non-adherent”  
74 behaviour [8, 9] (i.e., intentional or unintentional behaviours related to insulin dosing, glucose  
75 monitoring, diet, exercise, or healthcare review that do not align with medical advice). Despite the  
76 risks of life-altering complications, diabetes seems to be no exception. Adherence, in the context of  
77 young people with diabetes, can be considered as the extent to which a person’s behaviour  
78 coincides with medical advice [10] to conduct diabetes-related tasks and includes reacting  
79 accordingly to enable or restabilize glucose levels, attend regular appointments with health  
80 professionals, etc. Studies have shown that younger adults, including but not limited to transition  
81 clinics, are also less likely to attend diabetes health appointments than other age groups [11].

82

83 The characteristics of young adulthood are highly variable demographically, reflecting the diverse  
84 choices and constraints facing the individual as they explore possible life directions. Young adults

85 typically do not see themselves as adolescents, but many of them also do not see themselves  
86 entirely as adults [12]. Their self-perception and self-identity can vary by circumstance and emotion.  
87 For the young adult with diabetes, complex day to day tasks of managing diabetes can therefore be  
88 either overlooked in the milieu of other priorities or hidden in order to “fit in” [1]. Where self-  
89 management tasks are performed these can cause feelings of stigma, anger, self-resentment, and  
90 distress [13, 14] – reasons for which are not always clear.

91

92 Several studies have explored ways to enhance self-management of diabetes by young people [15-  
93 21] to improve glucose stability and thereby reduce risk of future complications. Interventions  
94 (usually in the form of training provided by the patient’s healthcare team[16, 22]) and their  
95 evaluation often focuses on clinical outcomes (such as reduction in HbA1C – a biochemical indicator  
96 of long term glucose control) as the primary outcome, with psychosocial adaptations reported  
97 secondarily [16, 23-25]. These interventions have involved participants ranging between 11 and 24  
98 years. There is evidence, albeit limited, in the medical literature of co-creative/participatory work  
99 with young people with T1D in the UK exploring potential adaptations to national health services  
100 and support to better serve this patient cohort [26-29].

101 Recognition of the importance of actively managing psychological and social issues for young people  
102 with diabetes is highlighted by the National Institute of Health and Care Excellence (NICE) clinical  
103 guideline (NG18) for diabetes (type 1 and type 2) in children and young people [5] which draws  
104 attention to the greater risk of emotional and behavioural difficulties in this population. NICE  
105 indicates the importance of access to mental health professionals and age-appropriate behavioural  
106 interventions or techniques for support.

107

108 In preliminary patient and public involvement discussions with young people with diabetes in  
109 Summer 2021 they stated that everyone is different and the needs and experiences of living with

110 T1D “vary massively.” They highlighted that they feel that services and support are not really  
111 designed for them and do not always focus on their priorities.

112

113 The overall aim of the research is to help young people with type 1 diabetes (young people with  
114 T1D) to live well with their condition during young adulthood (aged 16-21 years) as they move to  
115 independent living, particularly those who are experiencing difficulty or frustration with this lifelong  
116 condition. The focus will be holistic rather than targeting HbA1c. Through formative participatory  
117 research and utilising design thinking principles, this phase of the project will create a brief and  
118 simple intervention with young people and carers that aims to build strength and resilience  
119 (optimism, emotional and impulse awareness and control, empathy and connection, self-efficacy  
120 and flexible and accurate thinking [30]) so they can manage their diabetes-related tasks and  
121 behaviours, allowing them to live well. The intervention will likely be self-guided support and will  
122 offer individualised, and readily accessible psychosocial support day to day for young people with  
123 T1D. This will be additive to usual care received in structured health and social care settings [5, 31,  
124 32].

125

126 This study to design a brief and simple intervention for young people with T1D comprises three  
127 parts:

- 128 • Part 1: Surveys and semi structured research interviews and design of initial prototype  
129 intervention
- 130 • Part 2: Surveys and focus group discussions, refining the intervention and planning the pilot  
131 study with young people with T1D,
- 132 • Part 3: Developing the pilot study of the intervention with insights from Parts 1 and 2.

133

134      Secondarily, and after participating in a research activity, each young people with T1D will be asked  
135      for feedback about their experience of participating in a research activity about diabetes to gather  
136      an indicative assessment on how young people with T1D felt about engaging in research and  
137      whether they would recommend others to participate in similar research in the future (based on Net  
138      Promotor Score [33]).

139

140      The intervention is expected to focus on building up the self-efficacy and self-confidence of young  
141      people with T1D through self-guided channels, with an end goal of demonstrating acceptability and  
142      usability by young people through formative evaluation by the participants involved in co-creation.

143      The intervention will likely be a toolkit containing self-guided resources in some/all the following  
144      areas: handling disclosure of diabetes, asking for diabetes related support, recognizing the impact  
145      positive actions, planning for an independent young adulthood, and reflecting on the impact of  
146      decisions. Alternatively, or additionally, it could be a series of recommendations on how to design a  
147      healthcare service and self-gathered support network to be valuable and helpful to young people  
148      with T1D. The content will be such that it can be self-tailored to be meaningful to the individual's  
149      circumstances and self-beliefs. Research interviews and the design of the prototype intervention  
150      will be grounded in the behaviour change wheel for designing health interventions [34]. The focus  
151      group discussions will apply design thinking principles with the participant groups to tailor the  
152      intervention based on feedback. Digital communication will be explored and embedded as  
153      appropriate. As reported by Griffiths *et al*, digital communication (text, email, video call) between  
154      young people with long-term conditions and their NHS healthcare specialists can improve the health  
155      care experience and engagement [35]. The study showed this to be most effective when patients  
156      already have a trusting relationship with the healthcare team, and to improve flexible access for  
157      support, especially during times of change. This learning will be carried through to the intervention  
158      being developed.

159

160 The areas of focus identified above have been shaped through a critical literature review covering  
161 the previous 10 years, insights from patient and public involvement conversations with young  
162 people with T1D and the researcher’s lived experience of T1D.

163

164 This protocol describes the planned study and defines the criteria to proceed to pilot testing in a  
165 cohort of young people with type 1 diabetes. If effective, the insight-led, novel, brief and simple  
166 intervention designed in this work could enhance the lives of young people with diabetes and reduce  
167 the mental health burden associated with living with a long-term condition that requires meticulous  
168 management.

169



## 170 **Materials and Methods**

171 Through a primarily qualitative design, this participatory research will gather insights and  
172 involvement from the target population of young people with T1D. The integration of survey data  
173 will add a mixed methods element to inform the design a novel brief and simple supportive  
174 intervention will be used to co-develop an intervention with young people with T1D to assist in day  
175 to day living well with the condition.

176 The design comprises three parts as described below and in Figure 1. This adaptive design involves  
177 Patient and Public Involvement throughout the running of this study. The formative design is  
178 carefully designed to enable active participation with patients and people who know them well in  
179 the design of a novel intervention to be pilot tested in the next phase of research.

### 180 **Study Design for Part 1: In Depth interviews and prototype design**

#### 181 **In-Depth Interviews**

182 Semi-structured interviews will be used to identify the biggest challenges in the participants' lives at  
183 present, what are the most important priorities to young people regarding their diabetes and what  
184 they believe would make a difference to help them to live well with their condition as they build  
185 their young adult lives.

#### 186 **Part 1 (Interviews): Study population**

187 Sixteen patients with type 1 diabetes (age range 16-24 years old), and 5-6 siblings/peers (aged  $\geq 16$   
188 years) will be interviewed. This will provide an initial sample size of 21-22 interviews. The sample  
189 will be expanded until data saturation is achieved.[36, 37]).

190 The age range has been chosen to capture input from those near to the target age group for the  
191 intervention (16-21 years) to be designed with themes identified in interviews. The lower age limit  
192 of 16 years was selected for practical reasons. An upper age limit of 24 years (for young people with

193 T1D) was selected for inclusion in this design phase, to enable reflective thinking from participants  
194 on their life experience up to age 21 years.:

195 (i) "Life changes" that impact independence typically occur around the age of 16 years such  
196 as school exams, thinking more about university/career/life choices, changing social and  
197 education dynamics, gaining independence, learning to drive, etc.

198 (ii) People aged 16+ are legally able to provide informed consent to research participation  
199 without parental involvement/consent [38].

200 (iii) Other interventions designed for young people with T1D, such as WICKED (which offered  
201 a 5-day self-management education course delivered by health professionals to young  
202 people with T1D)[16], similarly define the lower age of the target population as 16 years.

203 (iv) This age group can be reached with targeted recruitment through young adult/transition  
204 NHS clinics (which typically manage this age group), which optimises recruitment  
205 opportunity through clinic adverts and targeted searching by recruitment sites.

206

207 The upper age of 21 years for future testing the intervention was chosen in recognition of the  
208 development of independence of young adults in their early twenties and the topics may be  
209 perceived as less relevant for older individuals.

210

211 Siblings/peers are included to provide a close external perspective of the issues faced by young  
212 people with T1D, additive to self-reflections. An upper age limit was not set for siblings/peers for  
213 inclusivity of a variety of external opinions and in recognition that siblings' and peers' ages can be  
214 close or far apart.

215

216 **Part 1 (Interviews): Inclusion/exclusion criteria**

217 Inclusion and exclusion criteria are shown in Figure 2.

218

### 219 **Part 1 (Interviews): Recruitment**

220 young people with T1D participants will be recruited from two (or three) National Health Service  
221 (NHS) clinics in England for young people with T1D and through adverts placed on the University of  
222 Brighton's Student Union website. A participant information sheet (PIS) will be provided by the  
223 researcher to all potential participants. young people with T1D will be provided with a PIS for their  
224 own involvement plus a separate PIS to pass on to their siblings/peers. Clinical nurses may also  
225 provide the PISs to their patients in clinic. The young people with T1D will have the authority to  
226 choose whether to pass on to their sibling/peer or not. The PIS for siblings/peers will also be  
227 provided to the sibling/peer by the researcher when contact is established. PISs will be available in  
228 printed form, via email and via the closed group Instagram study page.

229

230 Peers/siblings will be identified by asking the young people with T1D participants with T1D during  
231 recruitment whether they have a sibling or friend meeting the inclusion criteria who may also be  
232 willing to participate in a research interview for this study. There will be no obligation to identify a  
233 peer/sibling to take part in the study. It will be explained to each individual participant that they can  
234 make their own independent decision about whether to take part. This recruitment route was  
235 chosen to provide power to the primary participants (the young people with T1D) to enable them to  
236 control whether or not a sibling or peer will participate in the study.

237

238 The researcher will ensure each participant can ask questions about the study and will go through  
239 the informed consent process and use a separate informed consent form for each individual  
240 participant prior to any research activity with that individual. Participants will be free to withdraw

241 consent at any point at which point no further involvement in the research activity would be asked  
242 of them.

243 An informed consent form will be given to each participant to read, review and sign (if research  
244 takes place in-person). For remote research activities, informed consent may be captured verbally in  
245 a non-audio recorded conversation and documented by the researcher.

246

247 Each participant will be at least 16 years old and able to self-consent to participate in research in  
248 accordance with NHS Health Research Authority guidance "Research Involving Children [updated  
249 Sept 2021]". Parental consent will not be required.

250

251 All participants will be offered compensation in recognition of the time given to the interview. This  
252 includes young people with T1D, and siblings/peers. Any support person/buddy (if requested by  
253 participants) will not receive compensation.

254

### 255 **Part 1 (Interviews): Sampling**

256 After capturing informed consent, young people with T1D participants will be purposively sampled  
257 from across the age range and will include a mix of genders. Self-selected volunteers and potential  
258 participants identified by site nurse(s) will be purposively sampled using a combination strategy after  
259 completion of a Demographics Questionnaire. First stratified for gender mix (with a view to achieve  
260 parity of male: female participants, but also inclusive of other genders e.g., non-binary) and then  
261 stratified for variation in age with a view to include opinions from YPTID aged 16-19 years and 20-24  
262 years in roughly equally numbers. Chronological age will be used as a proxy for maturity and  
263 independence, and in anticipation that patients' needs from health services and family/friends may  
264 be different based on age. Anticipated numbers of young people with T1D participants are shown in

265 Table 1 Anticipated sampling quotas for young people with T1D participants. By the nature of the  
266 voluntary recruitment strategy, it is accepted there is an element of opportunism in the sampling  
267 and it will be accepted that the final group may not be equally distributed. Siblings/friends/peers  
268 will not be stratified for inclusion, but basic demographics will be collected to understand age and  
269 connection to young people with T1D.

270

271 *Table 1 Anticipated sampling quotas for young people with T1D participants*

|       | Female young people with T1D | Male young people with T1D | total |
|-------|------------------------------|----------------------------|-------|
| 16-19 | 4+                           | 4+                         | 8+    |
| 20-24 | 4+                           | 4+                         | 8+    |
| total | 8+                           | 8+                         | 16+   |

272

### 273 **Part 1 (Interviews): Data Collection**

274 Participants with T1D will be invited to complete the World Health Organisation – 5-item wellbeing  
275 index (WHO-5) [39] and Problem Areas in Diabetes (PAID) [40] questionnaires via a direct link onto a  
276 secure questionnaire per participant on JISC Online Surveys prior to conducting qualitative semi-  
277 structured interviews on a one-to-one basis. Interviews with nominated peer/siblings will be  
278 conducted separately. Joint (dyadic) interviews with the young people with T1D and their  
279 sibling/peer will be accepted if requested by the young people with T1D.

280

281 A support person/buddy will be permitted if requested by the young person. This will be made clear  
282 on the PIS. The buddy will be provided with an information sheet to explain their role - to ensure  
283 that the interview is conducted sensitively and respectfully and to support any needs they may have.  
284 They will not be considered as part of the research interview. Buddies' views will not be sought nor  
285 reported by the interviewer during the interview, and through the information sheet they will be  
286 dissuaded from commenting on or influencing the young people with T1D.

287 Interview guides will provide a framework for individual qualitative interviews that have been  
288 written with a blend of questions around specific areas of living with diabetes – such as at  
289 school/work/university and in interactions with family, friends, and significant others – as well as  
290 broader questions around day-to-day life. The intent of this approach is to encourage the  
291 participant to open-up through storytelling and thus for the researcher gain a deep understanding of  
292 the lived experience and challenges in different parts of life in their own words. The interviewer will  
293 seek to understand what they would find helpful (in a non-clinic setting) to address some of the  
294 challenges they face with diabetes. Interview guides will evolve iteratively per standard qualitative  
295 research practice. (Interview guides are provided in Supplementary Information).

296

297 Visual aids will be available (see Supplementary Information) during the interviews to help  
298 participants to articulate emotions and feelings associated with their experiences. These will be  
299 used at the discretion of the researcher where a participant struggles to articulate their  
300 thoughts/feelings or is not forthcoming with feelings or emotional impact. The stimuli were  
301 developed from words used by PPI participants, and distilled from literature relating to basic  
302 emotions [41] plus the researcher's own experience. Basic internet searching for copyright free  
303 images related to specific emotions was used to create the illustrations.

304

305 Confidential individual or dyadic interviews will be held online with a secure VoIP (Voice over  
306 Internet Protocol) platform (such as Teams (preferred), Skype, or FaceTime) depending on the  
307 participant's preferred channel for a real-time video call. If VoIP technology cannot be used (eg due  
308 to data charge concerns from participants or no webcam enabled device), interviews will take place  
309 by telephone. This remote approach is based on the anticipated continued caution in face-to-face  
310 interactions owing to the COVID-19 pandemic and aims to enable participation of a wider  
311 demographic of participants who previously may not have been willing or able to attend an in-  
312 person interview. The researcher will follow best practice for conducting qualitative research  
313 interviews online/by telephone effectively. This includes building rapport prior to "meeting" through  
314 email/messages, assessing non-verbal cues, and understanding the lived experience in a  
315 home/natural environment. It also includes logistical elements such as using private physical and  
316 online spaces for the conversation to protect participants' privacy as well as letting them know that  
317 they can pause the interview if they are interrupted (since the researcher may not be able to see if  
318 another person has entered the room) [42].

319

320 After their interview, young people with T1D participants will be asked how they felt about  
321 participating in the research and whether they would do something similar or recommend a friend  
322 to participate in similar research in the future. A "Thank You" communication will be sent to all  
323 participants along with the compensation after individual interviews.

324

### 325 **Part 1 (Interviews): Data Management and Analysis**

326 Interviews will be conducted, recorded, and transcribed verbatim, manually by the researcher. A  
327 password protected digital voice/video recorder will be used along with Teams automatic  
328 transcription option, assuming consent is granted for audio recording and that Teams is used as the  
329 platform for the conversation. Transcripts will be anonymised during data familiarisation and coded  
330 thematically [43] using NVivo 12 (QSR International, March 2020). Acceptance of recording the  
331 interview will be part of the informed consent procedure for participants to ensure that detailed and  
332 thorough interpretation can be made of the discussions. Any citation used from the interview will  
333 be anonymised, so participants' privacy is protected. Transcripts will be analysed with thematically  
334 coding. Four interviews will be selected at random, transcripts checked, and coding reviewed by a  
335 second member of the research team to assess alignment in interpretation (representing ~20% of  
336 the sample size). Any discrepancies that cannot be resolved by the two researchers will be  
337 moderated by a third member of the research team. If this situation arises, additional coded  
338 interview(s) will be reviewed to ensure alignment on interpretation. The number of reviews of  
339 coded interviews will continue until consensus is reached regarding interpretative themes.

340

341 Themes/codes will be focused on areas of concern that impact wellbeing and self-belief for young  
342 people with T1D to understand context and social influence of the areas of concern. Themes from  
343 the coded data will be assessed for amenability to change and used to identify recommendations  
344 that will shape an initial idea for a brief and simple intervention for young people which will be used  
345 as an initial concept in Part 2 where focus groups will review, rebuild and refine the intervention  
346 using a blend of co-creation principles [34, 44, 45].

347

348 Findings from WHO-5 and PAID questionnaires will be reported. Indirect comparison of findings  
349 with other similar cohorts (young adults with type 1 diabetes for  $\geq 6$  months) will be conducted to  
350 show, indicatively, whether the sample is representative of other populations with type 1 diabetes  
351 matched as closely as possible for age and duration of diabetes). PAID responses will be used to  
352 identify other problematic areas for participants associated with diabetes that may not have  
353 surfaced in the interviews.

354

### 355 **Part 1 (Interviews): Outputs**

356 From the work in part 1, skills or areas (themes) that young people identify as high priority to change  
357 that would improve to give them confidence to live well will be identified. These high priority  
358 themes will be assessed for ability to change at the individual level by taking learnings from other  
359 programmes such as TEENCOPE (USA) [15], WICKED (UK) [16] and BITES (UK, brief intervention  
360 although not specific to young people)[25]. High priority themes amenable to change that may  
361 reduce the barriers to diabetes adherence through building self-efficacy and coping mechanisms will  
362 be built into a brief and simple prototype intervention for young people with T1D.

363 Following the Behaviour Change Wheel approach to designing interventions [34], potential  
364 actions/changes that could improve the targeted behaviour of self-efficacy and coping strategies will  
365 be generated by the research team and assessed for (a) impact, and (b) likely of behaviour change,  
366 (c) effect of change on other behaviours and (d) ability to measure change using a 0-4 ranking scale  
367 for each element. The highest-ranking potential actions will become the focus of a prototype  
368 intervention.

369 The prototype intervention, in the form of a PowerPoint representation or infographics, will be  
370 created by the researcher using insights gained in the Research Interviews will be taken into Part 2 -  
371 focus group discussions.

372

### 373 **Study Design for Part 2: Focus group discussions (FGDs)**

374 Ideas and opinions from the participants of the focus groups will be utilised to refine a prototype  
375 toolkit for young people with type 1 diabetes as designed at the end of Part One.

376

### 377 **Part 2 (Focus Group Discussions) - Population**

378 Two focus groups will be convened to review, rebuild and refine the intervention concept  
379 (prototype) created by the researcher using themes identified in Part 1.

380 (i) One focus group will consist of young people with T1D– the intended users of the  
381 intervention - ideally in a dyad with a self-nominated peer (n=8-10)

- 382                   • Participants will invited following part 1 research interviews (if they have agreed to  
383 participate in further research). It will be permitted to extend the invitation to FGD  
384 to other young people with T1D who were unconnected to the research interviews  
385 in Part 1 (e.g. to increase the numbers of participants if Part 1 interviewees decline  
386 further involvement).
- 387       (ii)       The other focus group will consist of diabetes specialist nurse(s), teacher(s) and  
388 parents/carers. (n=6-8)
- 389                   • Participants may or may not be connected to the young people with T1D in FGD (i)  
390

## 391 **Part 2 (Focus Group Discussions): Inclusion/exclusion criteria**

392 Inclusion and exclusion criteria are shown in Figure 2.

393

## 394 **Part 2 (Focus Group Discussions): Recruitment and sampling**

395 Recruitment tactics described above for Part 1 will be mirrored for the FGD with young people with  
396 T1D. Participants from Part 1 will be allowed to participate in Part 2 but additional recruitment of  
397 new young people with T1D may be considered if required for numbers.

398

399 Parents/carers/teachers will be sourced by asking the young people with T1D participants with T1D  
400 during Part 1 research interviews whether they would be willing to recommend one of their  
401 parents/carers and/or a teacher who may also be willing to participate in a focus group discussion  
402 for this study.

403

404 Anticipated numbers of parents/carers, teachers and diabetes nurses are given in Table 2.

405

406 All activities will be voluntary, and individuals will provide consent for their own participation for  
407 each applicable part of the research and following the principles described above in Part 1. There  
408 will be no obligation for young people with T1D to identify a parent/carer/teacher to take part in the  
409 study. It will be explained to each individual participant that they can make their own independent  
410 decision about whether to take part. The researcher will ensure each participant can ask questions  
411 about the study and will go through the informed consent process and use a separate informed  
412 consent form for each individual participant.

413

414 *Table 2 Anticipated quotas for Focus Group Discussion with carers*

| Focus Group Discussion participants | Target number of participants |
|-------------------------------------|-------------------------------|
| Parent or carers                    | 2+                            |
| Teacher                             | 2+                            |
| Diabetes nurse                      | 2+                            |
| <b>Total</b>                        | <b>6-8</b>                    |

415

416 Recruitment for the focus groups will include asking Part 1 interview participants with young people

417 with T1D whether they would like to join a FGD. The recruitment period will extend to 6 months post



418 interviews if additional participants need to be found. FGDs will occur after the completion and  
419 analysis of Part 1.

420

421 Participants will be offered compensation in recognition of the time given to the focus group  
422 discussion. If the meeting is held in-person, reasonable travel expenses will be recompensed (eg  
423 standard class rail fare, parking, mileage at prevailing *gov.uk* rate for business travel).

424

425 The number of participants has been selected to enable the voice of each participant to be heard in  
426 the FGDs whilst still enabling a range of opinions to be captured. Focus group (ii) comprises fewer  
427 individuals as the intent is to gather more general reflections from the perspective of  
428 parents/carers/teachers/nurses as opposed to specific feedback on acceptability and content from  
429 the anticipated users of the prototype intervention from the young people with T1D FGD (i).

430

431 As for Part 1, a participant information sheet will be provided to each potential participant with the  
432 opportunity to ask questions. Informed consent will be obtained by the researcher and will be  
433 recorded from all participants by the researcher. Consent can be freely withdrawn at any point.  
434 Due to the nature of group discussions and difficulties identifying individual speakers, it will not be  
435 possible withdraw individual data gathered during FGD up to the point of consent withdrawal  
436 (however they could leave the discussion part-way through).

437

## 438 **Part 2 (Focus Group Discussions): Data Collection**

439 Prior to attending the FGD (FGD i), new participants with T1D will be asked to complete a  
440 demographics questionnaire, the WHO-5 [39] and PAID [40] questionnaires using a secure link to  
441 JISC Online Surveys. The questionnaires are provided in **Error! Reference source not found.**

442 Face-to-face groups will be planned but with a back-up option of virtual meetings (refer to Part 1 for  
443 VoIP platform information). Delivery will be governed by any COVID-19 (or similar) restrictions on  
444 meetings and associated public health, NHS and University guidelines.

445

446 Insights will not be shared between focus groups. Both will be treated as *de novo*, recognising that  
447 perspectives on how to support transition to adulthood could be very different for young people  
448 compared to carers.

449

450 Carers' perspectives (FGD ii) will be explored to capture close external perspectives and ideas.

451

452 An online web forum may be used (e.g., for co-creating material in a focus group discussion). Access  
453 will be restricted to participants and supervisors only. Informed consent will be obtained from all  
454 participants to work on this shared platform prior to use. Participants may choose to use  
455 pseudonyms if preferred.

456

457 FGDs will be recorded and transcribed verbatim apart from anonymization as described in Part 1 (for  
458 research interviews).

459

460 At the start of the FGD, Ways of Working in the Workshop will be discussed and agreed by all  
461 participants. This will include as a minimum (a) respect for the privacy of workshop discussions, (b)  
462 respect of others' opinions and ideas, (c) allowing everyone to speak and contribute their individual  
463 ideas. The outlined principles (see figure 2) may be tailored by the participants.

464 Using design thinking principles [45], focus groups will be convened with young people with T1D  
465 and, separately carers of young people with T1D, to review the prototype, comment and provide  
466 ideas for improvement or change.

467  
468 Design thinking is a qualitative methodology that is centred on input from target users, more  
469 commonly used in business and technology than healthcare for ill-defined complex problems. The  
470 approach uses insights from potential users and environmental sources to create new ideas and  
471 solutions. The design thinking model comprises five phases – empathy for the issue, definition of  
472 the problem, ideation around potential solutions, creation of a prototype to address the problem,  
473 and testing [46]. Iteration is used for refinement as required. This participatory method was chosen  
474 to ensure that the voice and desires of the end users are fundamental to the design of the  
475 intervention. It is a less structured methodology than the Behaviour Change Wheel (BCW) [34]  
476 however elements of BCW will also be utilized as defined below.

477  
478 Using the BCW for defining the problem, participants will be asked to reflect on the themes  
479 identified in the research interviews to define the problem(s) identified by interviewees in  
480 behavioural terms (what behaviour are we seeking to change, where does it occur, who is involved).  
481 A COM-B ('capability', 'opportunity', 'motivation' and 'behaviour') approach will be taken to  
482 structure description of what needs to happen for the target behaviour to change and to articulate  
483 whether there is a need for change. To ideate potential solutions, the prototype intervention will be  
484 shared with the participants who will be asked to review whether it meets the areas of focus  
485 outlined above. Questions will be addressed and areas to change/new ideas will be captured.

486  
487 Participants will also be invited to feedback and comment on an initial proposal of a pilot study  
488 (including target population for the study and potential assessment questionnaires from an *a priori*  
489 list). The intent is to understand what would likely be acceptable, usable, and valued by the  
490 participants in the future pilot study. Suggestions for other assessments by the participants will also  
491 be considered during the focus group discussion as long as the areas of interest can be captured  
492 using validated questionnaires. The intent is to design the intervention and future pilot study so that

493 it will likely be acceptable and usable by the participants. Suggestions for other outcomes in a pilot  
494 study that would be important to young people will also be considered during the FGD discussion.

495

496 At the end of the focus group discussion with young people with T1D the participants will be asked if  
497 they would be willing to look at the resultant intervention incorporating their ideas as formative  
498 testing prior to taking forward to pilot testing. If they consent, the participants will be asked to  
499 consent to further participate via email, message, video call, telephone call or face to face (the  
500 meeting set up would be their choice) where they would be able to review and ask questions and  
501 offer suggestions for further modifications to the intervention on a one-to-one or small group basis.  
502 Agreeing to further engagement is not a pre-requisite of attending the focus group discussion. A  
503 separate consent form will be used for FGD follow up.

504

505 After their participation, as in Part 1, young people with T1D participants will be asked how they felt  
506 about participating in the research and whether they would do something similar or recommend a  
507 friend to participate in similar research in the future. A “Thank You” communication will be sent to  
508 all participants along with the compensation after the focus group discussion.

509

510

## 511 **Part 2 (Focus Group Discussions): Data Management and Analysis**

512 If conducted in person, focus group discussions will be recorded using a password protected digital  
513 voice recorder. If the meeting(s) occurs onscreen, the Teams automatic transcription option will be  
514 used in addition to the voice record, assuming consent is granted for audio recording.

515 A narrative of learnings will be generated to summarise the FGDs and recommendations within [47].

516 Findings from WHO-5 and PAID questionnaires will be reported as in Part 1.

517

518

519 **Part 2 (Focus Group Discussions): Outputs**

520 Insights and recommendations from FGDs will be taken forward by the researcher into Part 3 where

521 the intervention will be rebuilt or refined ready to pilot test in a randomised study. A pilot study

522 protocol will be created.

523

524 **Study Design for Part 3: Building the intervention ready to pilot test and defining the pilot study**

525 **protocol**

526 The initial prototype designed with insights from the research interviews in Part 1 will be reviewed

527 and adapted by the researcher based on the insights from the FGDs in Part 2.

528

529 After adaptation of the intervention, the researcher may return to the FGD participants (pending

530 their consent) to show them the resultant intervention prior to taking forward to pilot testing. The

531 participants will be able to review and ask questions and offer suggestions for further modifications.

532 Formative evaluation will be conducted with the participants through fielding (a) the user experience

533 questionnaire [48], and (b) a bespoke multiple choice questionnaire about the intervention to assess

534 acceptability and usability of the of the intervention. Participants will be invited to complete

535 questionnaires via a direct link onto a secure questionnaire via JISC Online Surveys per participant.

536 Using insights from the FGDs, a protocol for testing the final intervention in a randomised pilot study

537 will be created by the researcher.

538

539 **Data handling and Data Protection**

540 Participants will be assigned a study number by the researcher which will be used in all  
541 documentation relating to the research (eg interview transcripts, FGD participant lists, questionnaire  
542 documents, etc). General Data Protection Regulations (GDPR) will be adhered to ensure data privacy  
543 and appropriate data handling.

544

545 **Safety Considerations During Data Collection Activities in Parts 1 and 2**

546 In depth interviews and group discussions about living with diabetes that may cover topics that  
547 young people and/or parents may be sensitive or frustrated about. This may generate emotional  
548 response and/or distress. An Issues Management guide will be included in each interview/focus  
549 group discussion activity guide so that such situations can be handled appropriately at the time to  
550 ensure the wellbeing of the participant.

- 551 • For example, an interview may be paused, stopped, or rescheduled if needed.

552

553 Disclosure of anything life threatening or that may impact their immediate safety, physical or mental  
554 health of the participants or others would be handled urgently and referred for appropriate support  
555 within 24 hours.

556

557 Living with diabetes has an omnipresent risk of occurrence of out-of-range blood glucose - either  
558 hyper- or hypoglycaemia. This may present as acute unwellness and would likely require urgent  
559 attention by the participant to correct blood glucose.

- 560       • During Part 1 (research interviews) if any participant became unwell during the interview (eg  
561       due to hypoglycaemia) the interview would be stopped. The participant would be asked if  
562       they would like to re-engage in the interview once they had fully recovered.
- 563       • During Part 2 (focus group discussions) if any participant became unwell during the  
564       discussion (eg due to hypoglycaemia) they would be able to leave the discussion. The  
565       discussion would be paused to ensure the wellbeing of the individual but may carry on  
566       either with or without the affected individual. Treatment for hypoglycaemia (glucose gel,  
567       glucotabs, carbohydrate-based snacks) will be available in the room if required.

568

569   People living with diabetes may be at higher risk of transmissible infection, or sequelae of infection,  
570   than other people. Considering COVID-19 or similar pandemic/endemic public health infection risk:

- 571       • Part 1 research interviews will be conducted via video call or telephone call to avoid risk of  
572       transfer of infection and to enable broader participation.
- 573       • Part 2 focus group discussions are intended to be face-to-face and will be conducted with  
574       COVID-19 safe procedures in place (ventilation, hand sanitiser provided, face masks  
575       provided if required by Public Health guidance).
- 576           ○ If recommended by national, local or organizational guidelines, FGDs will be able to  
577           be conducted online via video conference to avoid risk of infection.
- 578           ○ The more conservative approach will be taken if guidelines differ.

579

## 580   **Patient and Public Involvement (PPI)**

581   The adaptive design of this study involves PPI throughout the running of this study and is described  
582   throughout this article.

583

## 584 **Discussion**

### 585 **Main contributions of the study**

586 The learnings from this project will be used to design a user-informed, testable brief and simple  
587 intervention that will be taken forward into pilot testing where the intervention will be assessed in a  
588 randomised sample of young people with diabetes (aged 16-21 years) in England.

589 Input from the FGD groups will inform the pilot study design and how to assess success and impact  
590 on wellbeing, clinical management of diabetes and willingness to engage with healthcare. A  
591 prototype design of a pilot study and the proposed outcomes will be shared with the group and the  
592 group will be asked to reflect on, and make recommendations whether, the questionnaire-based  
593 outcomes are appropriate, and whether they would like to consider other outcomes within the  
594 study. This input will provide preliminary evidence of the acceptability and feasibility of the trial  
595 design.

596

### 597 **Strengths and Limitations**

598 The participatory approach with young people with T1D aims to enable identification of key areas for  
599 the intervention to focus on. Their input will inform the style and narrative of the intervention to  
600 optimise opportunity for success. Involving young people in interviews and FGDs may also have  
601 some psychological benefit, with participants possibly benefitting from the primary focus on their  
602 own opinions, sharing experiences and feeling empowered through being treated as valued  
603 consultants.

604 Giving the young people with T1D control about who, if anyone, they nominate to take part and  
605 whether they are interviewed together/individually in Part 1 is similarly intended to give shared  
606 control and primacy to their opinions. In doing so, it is anticipated that rapport and respect will be  
607 more readily built, and the participants will engage deeply in the research providing insights and



608 creative ideas. This level of input and review in FGDs aims to optimise the usability and acceptability  
609 of the intervention to the target population.

610 Within the qualitative formative research there is some potential to explore the influence of past  
611 specific experiences (recent or otherwise) that have led participants to the self-beliefs and priorities  
612 that they discuss in the interview. However, this is limited compared to, for example, a longitudinal  
613 qualitative study on the evolution of diabetes-related beliefs. These are beyond the scope of this  
614 research. Evolution of diabetes-related beliefs through childhood and adolescence will be explored  
615 through review of other studies.

616 Recall bias may present where participants may focus on one particularly challenging incident that  
617 has shaped their thoughts on that day. Recency and saliency (and perceived social  
618 desirability/acceptability) are expected to influence topics brought up by the participants.

619 Encouragement of reflective thinking and introduction of time-bound questions (eg can you  
620 remember how you felt 6 months before xxx happened. What was it like then?), along with  
621 structured questions around different life areas will be used to aid recall and widen the focus  
622 beyond a few key incidents or memories. To encourage discussion of topics that challenge social  
623 desirability/acceptability, the researcher will focus on building trust and rapport early in the  
624 engagement. Confidentiality will be assured (as per informed consent).

625 The potential for selection bias of young people participating in any part of this research is an  
626 inherent bias/limitation to any study based on voluntary participation. Those young people who  
627 chose to participate may differ in an important way from those who chose not to participate.

628 By the conversational nature of Part 1 (research interviews) and Part 2 (FGDs), this research may  
629 better capture the views, preferences, and experiences of participants who are willing and able to  
630 speak out and share ideas (anticipated to be more extrovert/confident/articulate) than quieter,  
631 solitary or shy individuals. Engaging with teachers/carers/nurses in Part 2 (FGDs) will provide an

632 indirect opinion about likely acceptability of the prototype intervention by more  
633 introvert/shy/quiet/less articulate young people with T1D.

634 A further selection bias could be driven by the sites (NHS and university) that participate in, and  
635 support recruitment of, young people into the study. Not only from a socio-economic demographic  
636 perspective but also that the beliefs and priorities of the young people included may well have been  
637 shaped by the skills and interactions with their healthcare providers, their friends, their school  
638 environment, etc. Demographics and services are known to be different around the country so it is  
639 reasonable to assume that patients' self-beliefs and priorities may also differ in different  
640 geographies.

641 Owing to the conversational nature of the formative research, the inclusion criteria for this study is  
642 reliant on participation of those who can speak and understand English. This potentially excludes  
643 other people who might also benefit from this intervention. Whilst a limitation at this formative  
644 stage, translation and non-written adaptations may be considered as a development in future  
645 research.

646 The other limitations identified in this section will be explored in further research that would widen  
647 the reach and usability pending successful completion of the pilot study.

648

#### 649 **Future Direction**

650 Insights and learnings from this work will be shared with participants and submitted for publication  
651 to raise awareness of the issues and priorities of young people with diabetes.

652 The design of the final intervention (output from Part 3) will be taken forward into pilot testing  
653 (pending future ethical approval) and will be published in association with the pilot study. If the  
654 pilot study shows preliminary evidence of effectiveness of the intervention, it will be scaled to a  
655 larger population in a randomised controlled trial and health economic evaluation to assess (i) the

656 scale and durability of improvement that is achievable in different age groups, and (ii) the health  
657 economic impact of the intervention.

658 Depending on the transferability of the priority areas identified in this study, extension of the  
659 intervention to other chronic conditions of adolescence/young adulthood which require some  
660 element of self-management will be explored (eg maturity-onset diabetes of the young (MODY),  
661 cystic fibrosis, juvenile idiopathic arthritis, haemophilia).

662 If effective in testing, this intervention and the insights from this work could enhance the lives of  
663 young people with diabetes and reduce the mental health burden associated with living with a long-  
664 term condition that requires meticulous management.

665

## 666 **ACKNOWLEDGEMENTS**

667 Thanks are due to academic colleagues, clinicians and patients who have contributed to the design  
668 of this programme through provision of feedback on the protocol and patient materials.

669

## 670 **References**

671

- 672 1. Karlsson A, Arman M, and Wikblad K, *Teenagers with type 1 diabetes-a phenomenological*  
673 *study of the transition towards autonomy in self-management*. Int J Nurs Stud, 2008. **45**(4):  
674 p. 562-570.
- 675 2. *The Diabetes Control and Complications Trial Research Group. The Effect of Intensive*  
676 *Treatment of Diabetes on the Development and Progression of Long-Term Complications in*  
677 *Insulin-Dependent Diabetes Mellitus*. . N Engl J Med, 1993. **329**: p. 977-986.

- 678 3. Wass, J.A.H., K. Owen, and H. Turner, *Oxford handbook of endocrinology and diabetes*. 3rd  
679 edition ed. 2014: Oxford Handbooks.
- 680 4. Kar, P., R. Flury, and S.M. Ng *Delivering the NHS Long Term Plan to ensure young people with*  
681 *diabetes have the care they need for their mental health*. Diabetesonthenet.com Issue:  
682 Vol:08 No:02, 2019.
- 683 5. *NICE guideline [NG18]. Diabetes (type 1 and type 2) in children and young people: diagnosis*  
684 *and management. Published: 01 August 2015 Last updated: 29 June 2022.*
- 685 6. *NICE guideline [NG17]. Type 1 diabetes in adults: diagnosis and management. Published: 26*  
686 *August 2015 Last updated: 21 July 2021.*
- 687 7. *NICE guideline [NG28]. Type 2 diabetes in adults: management. Published: 02 December*  
688 *2015 Last updated: 24 November 2021.*
- 689 8. Rapoff, M., *Consequences of nonadherence and correlates of adherence. In Rapoff MA.*  
690 *Adherence to Pediatric Medical Regimens*. 2010, New York, Springer.
- 691 9. Smith, B., Shuchman, M., *Problem of nonadherence in chronically ill adolescents: Strategies*  
692 *for assessment and intervention*. *Current Opinion in Pediatrics*, 2005. **17**: p. 613—618.
- 693 10. *NICE Clinical guideline [CG76]. Medicines adherence: involving patients in decisions about*  
694 *prescribed medicines and supporting adherence. Published: 28 January 2009.*
- 695 11. Brewster, S., et al., *Non-attendance at diabetes outpatient appointments: a systematic*  
696 *review*. *Diabetic Medicine*, 2020. **37**(9): p. 1427-1442.
- 697 12. Arnett J. J., *Emerging adulthood: A theory of development from the late teens through the*  
698 *twenties*. *American Psychologist*, 2000. **55**: p. 469—480.
- 699 13. Wasserman R, A.B., Schwartz DD, *Illness-Specific Risk-Taking in Adolescence: A Missing Piece*  
700 *of the Nonadherence Puzzle for Youth With Type 1 Diabetes?* *Diabetes Spectr.*, 2017. **30**(1):  
701 p. 3-10.
- 702 14. Wasserman, R.M., et al., *Diabetes-Specific Risk Taking-Psychometric Properties of a Measure*  
703 *for Adolescents with Type 1 Diabetes (T1D)*. *Diabetes*, 2018. **67**: p. 2.

- 704 15. Whittemore, R., et al., *An internet coping skills training program for youth with type 1*  
705 *diabetes: six-month outcomes*. Nurs Res, 2012. **61**(6): p. 395-404.
- 706 16. Johnson, B., et al., *Working with Insulin, Carbohydrates, Ketones and Exercise to Manage*  
707 *Diabetes (WICKED): evaluation of a self-management course for young people with Type 1*  
708 *diabetes*. Diabet Med, 2019. **36**(11): p. 1460-1467.
- 709 17. Hilliard, M.E., et al., *Strengths-Based Behavioral Intervention for Parents of Adolescents With*  
710 *Type 1 Diabetes Using an mHealth App (Type 1 Doing Well): Protocol for a Pilot Randomized*  
711 *Controlled Trial*. JMIR Res Protoc, 2018. **7**(3): p. e77.
- 712 18. Hilliard, M.E., et al., *Featured Article: Strengths-Based, Clinic-Integrated Nonrandomized Pilot*  
713 *Intervention to Promote Type 1 Diabetes Adherence and Well-Being*. J Pediatr Psychol, 2019.  
714 **44**(1): p. 5-15.
- 715 19. Sheehy, S., G. Cohen, and K.R. Owen, *Self-management of diabetes in children and young*  
716 *adults using technology and smartphone applications*. Curr Diabetes Rev, 2014. **10**(5): p.  
717 298-301.
- 718 20. Reid, M.W., et al., *CoYoT1 Clinic: Home Telemedicine Increases Young Adult Engagement in*  
719 *Diabetes Care*. Diabetes Technol Ther, 2018. **20**(5): p. 370-379.
- 720 21. Whittemore, R., et al., *Type 1 Diabetes eHealth Psychoeducation: Youth Recruitment,*  
721 *Participation, and Satisfaction*. J Med Internet Res, 2013. **15**(1): p. e15.
- 722 22. George, J.T., et al., *Brief Intervention in Type 1 diabetes – Education for Self-efficacy (BITES):*  
723 *Protocol for a randomised control trial to assess biophysical and psychological effectiveness*.  
724 BMC Endocrine Disorders, 2007. **7**(1): p. 6.
- 725 23. Price, K.J., et al., *Effectiveness of the Kids in Control of Food (KICK-OFF) structured education*  
726 *course for 11-16 year olds with Type 1 diabetes*. Diabet Med, 2016. **33**(2): p. 192-203.
- 727 24. Liu, F., et al., *Different Effects of Structured Education on Glycemic Control and Psychological*  
728 *Outcomes in Adolescent and Adult Patients with Type 1 Diabetes: A Systematic Review and*  
729 *Meta-Analysis*. Int J Endocrinol, 2020. **2020**: p. 9796019.

- 730 25. George, J.T., et al., *Clinical effectiveness of a brief educational intervention in Type 1*  
731 *diabetes: results from the BITES (Brief Intervention in Type 1 diabetes, Education for Self-*  
732 *efficacy) trial*. Diabet Med, 2008. **25**(12): p. 1447-53.
- 733 26. Brew-Sam, N., et al., *Experiences of Young People and Their Caregivers of Using Technology*  
734 *to Manage Type 1 Diabetes Mellitus: Systematic Literature Review and Narrative Synthesis*.  
735 JMIR Diabetes, 2021. **6**(1): p. e20973.
- 736 27. DigiBete. 2021 Nov 2021]; Available from: <https://www.digibete.org/>.
- 737 28. Papoutsis, C., Hargreaves, D., Colligan, G., Hagell, A., Patel, A., Campbell-Richards, D., Viner,  
738 R.M., Vijayaraghavan, S., Marshall, M., Greenhalgh, T. and Finer, S., *Group clinics for young*  
739 *adults with diabetes in an ethnically diverse, socioeconomically deprived setting (TOGETHER*  
740 *study): protocol for a realist review, co-design and mixed methods, participatory evaluation*  
741 *of a new care model*. BMJ Open, 2017. **7**(6): p. p.e017363.
- 742 29. Ryninks, K., Sutton, E., Thomas, E., Jago, R., Shield, J.P. and Burren, C.P., *Attitudes to exercise*  
743 *and diabetes in young people with type 1 diabetes mellitus: a qualitative analysis*. PLoS One,  
744 2015. **10**(10): p. p.e0137562.
- 745 30. *Worth-it Positive Education CIC. Blog - Building Resilience in Young People*. May 2021];  
746 Available from: [https://worthit.org.uk/blog/building-resilience-young-  
747 people/#:~:text=Resilience%20helps%20young%20people%20gain,or%20a%20orange%20of%  
748 20stressors. .](https://worthit.org.uk/blog/building-resilience-young-people/#:~:text=Resilience%20helps%20young%20people%20gain,or%20a%20orange%20of%20stressors)
- 749 31. NHS England Medical Directorate, *Diabetes Transition and Young Adult Service Specification*  
750 *and Guidance Document*. 2016.
- 751 32. NHS Digital. *NHS launches new online support for people with diabetes*. 2020; Available  
752 from: [https://www.england.nhs.uk/2020/06/nhs-launches-new-online-support-for-people-  
753 with-diabetes/](https://www.england.nhs.uk/2020/06/nhs-launches-new-online-support-for-people-with-diabetes/).
- 754 33. Reichheld, F., *The One Number You Need to Grow*. Harvard Business Review, 2003. **81**: p. 46–  
755 54.

- 756 34. Michie S., A.L., West R, *Behaviour Change Wheel - A Guide to Designing Interventions*. 2014,  
757 Great Britain: Silverback Publishing.
- 758 35. Griffiths F, B.C., Cave J, Dritsaki M, Fraser J, Hamilton K, Huxley C, Ignatowicz A, Kim S,  
759 Kimani P, Madan J, Slowther A, Sujana M, Sturt J, *Timely Digital Patient-Clinician*  
760 *Communication in Specialist Clinical Services for Young People: A Mixed-Methods Study (The*  
761 *LYNC Study)*. *J Med Internet Res*, 2017. **19**(4): p. e102.
- 762 36. Saunders, B., et al., *Saturation in qualitative research: exploring its conceptualization and*  
763 *operationalization*. *Quality & quantity*, 2018. **52**(4): p. 1893-1907.
- 764 37. Glaser, B.G., A.L. Strauss, and E. Strutzel, *The Discovery of Grounded Theory; Strategies for*  
765 *Qualitative Research*. *Nursing Research*, 1968. **17**(4): p. 364.
- 766 38. NHS Health Research Authority. *Research Involving Children*. 2021 Sept 2021; Available from:  
767 [https://www.hra.nhs.uk/planning-and-improving-research/policies-standards-](https://www.hra.nhs.uk/planning-and-improving-research/policies-standards-legislation/research-involving-children/)  
768 [legislation/research-involving-children/](https://www.hra.nhs.uk/planning-and-improving-research/policies-standards-legislation/research-involving-children/).
- 769 39. Christian Winther Topp, S.D.Ø., Susan Søndergaard, Per Bech, *The WHO-5 Well-Being Index:*  
770 *A Systematic Review of the Literature*. *Psychother Psychosom*, 2015. **84**: p. 167–176.
- 771 40. Polonsky, W.H., et al., *Assessment of diabetes-related distress*. *Diabetes Care*, 1995. **18**(6): p.  
772 754-60.
- 773 41. Ekman, P., Cordaro, D, *What is Meant by Calling Emotions Basic*. *Emotion Review*, 2011.  
774 **3**(4): p. 364–370.
- 775 42. Lo Iacono, V., Symonds, Paul and Brown, David H.K. , *Skype as a Tool for Qualitative*  
776 *Research Interviews*. *Sociological Research Online*, 2016. **21**(2): p. 12.
- 777 43. V. Braun, V.C., *Using thematic analysis in psychology*. *Qualitative Research in Psychology*,  
778 2006. **3**(2): p. 77-101.
- 779 44. Osterwalder A, P.Y., Bernarda G, Smith A. , *Value proposition design: how to create products*  
780 *and services customers want*. 2014, New Jersey: John Wiley & Sons,.

- 781 45. Roberts JP, F.T., Trowbridge MJ, Bent C. , *A design thinking framework for healthcare*  
782 *management and innovation*. Healthcare, 2016. **4**: p. 11-14.
- 783 46. Hasso-Plattner-Institut. *Shape the future with Design Thinking*. Available from:  
784 <https://hpi.de/en/school-of-design-thinking/design-thinking.html>.
- 785 47. C. Fioretti, K.M., S. Riva, S. Oliveri, M. Masiero, G. Pravettoni *Research studies on patients'*  
786 *illness experience using the Narrative Medicine approach: a systematic review*. BMJ Open,  
787 2016. **14**: p. e011220. d.
- 788 48. A Hinderks, M.S., J Thomaschewski. *User Experience Questionnaire (UEQ)*. July 2021];  
789 Available from: <https://www.ueq-online.org/>.
- 790



Figure 1: Stages of the Study

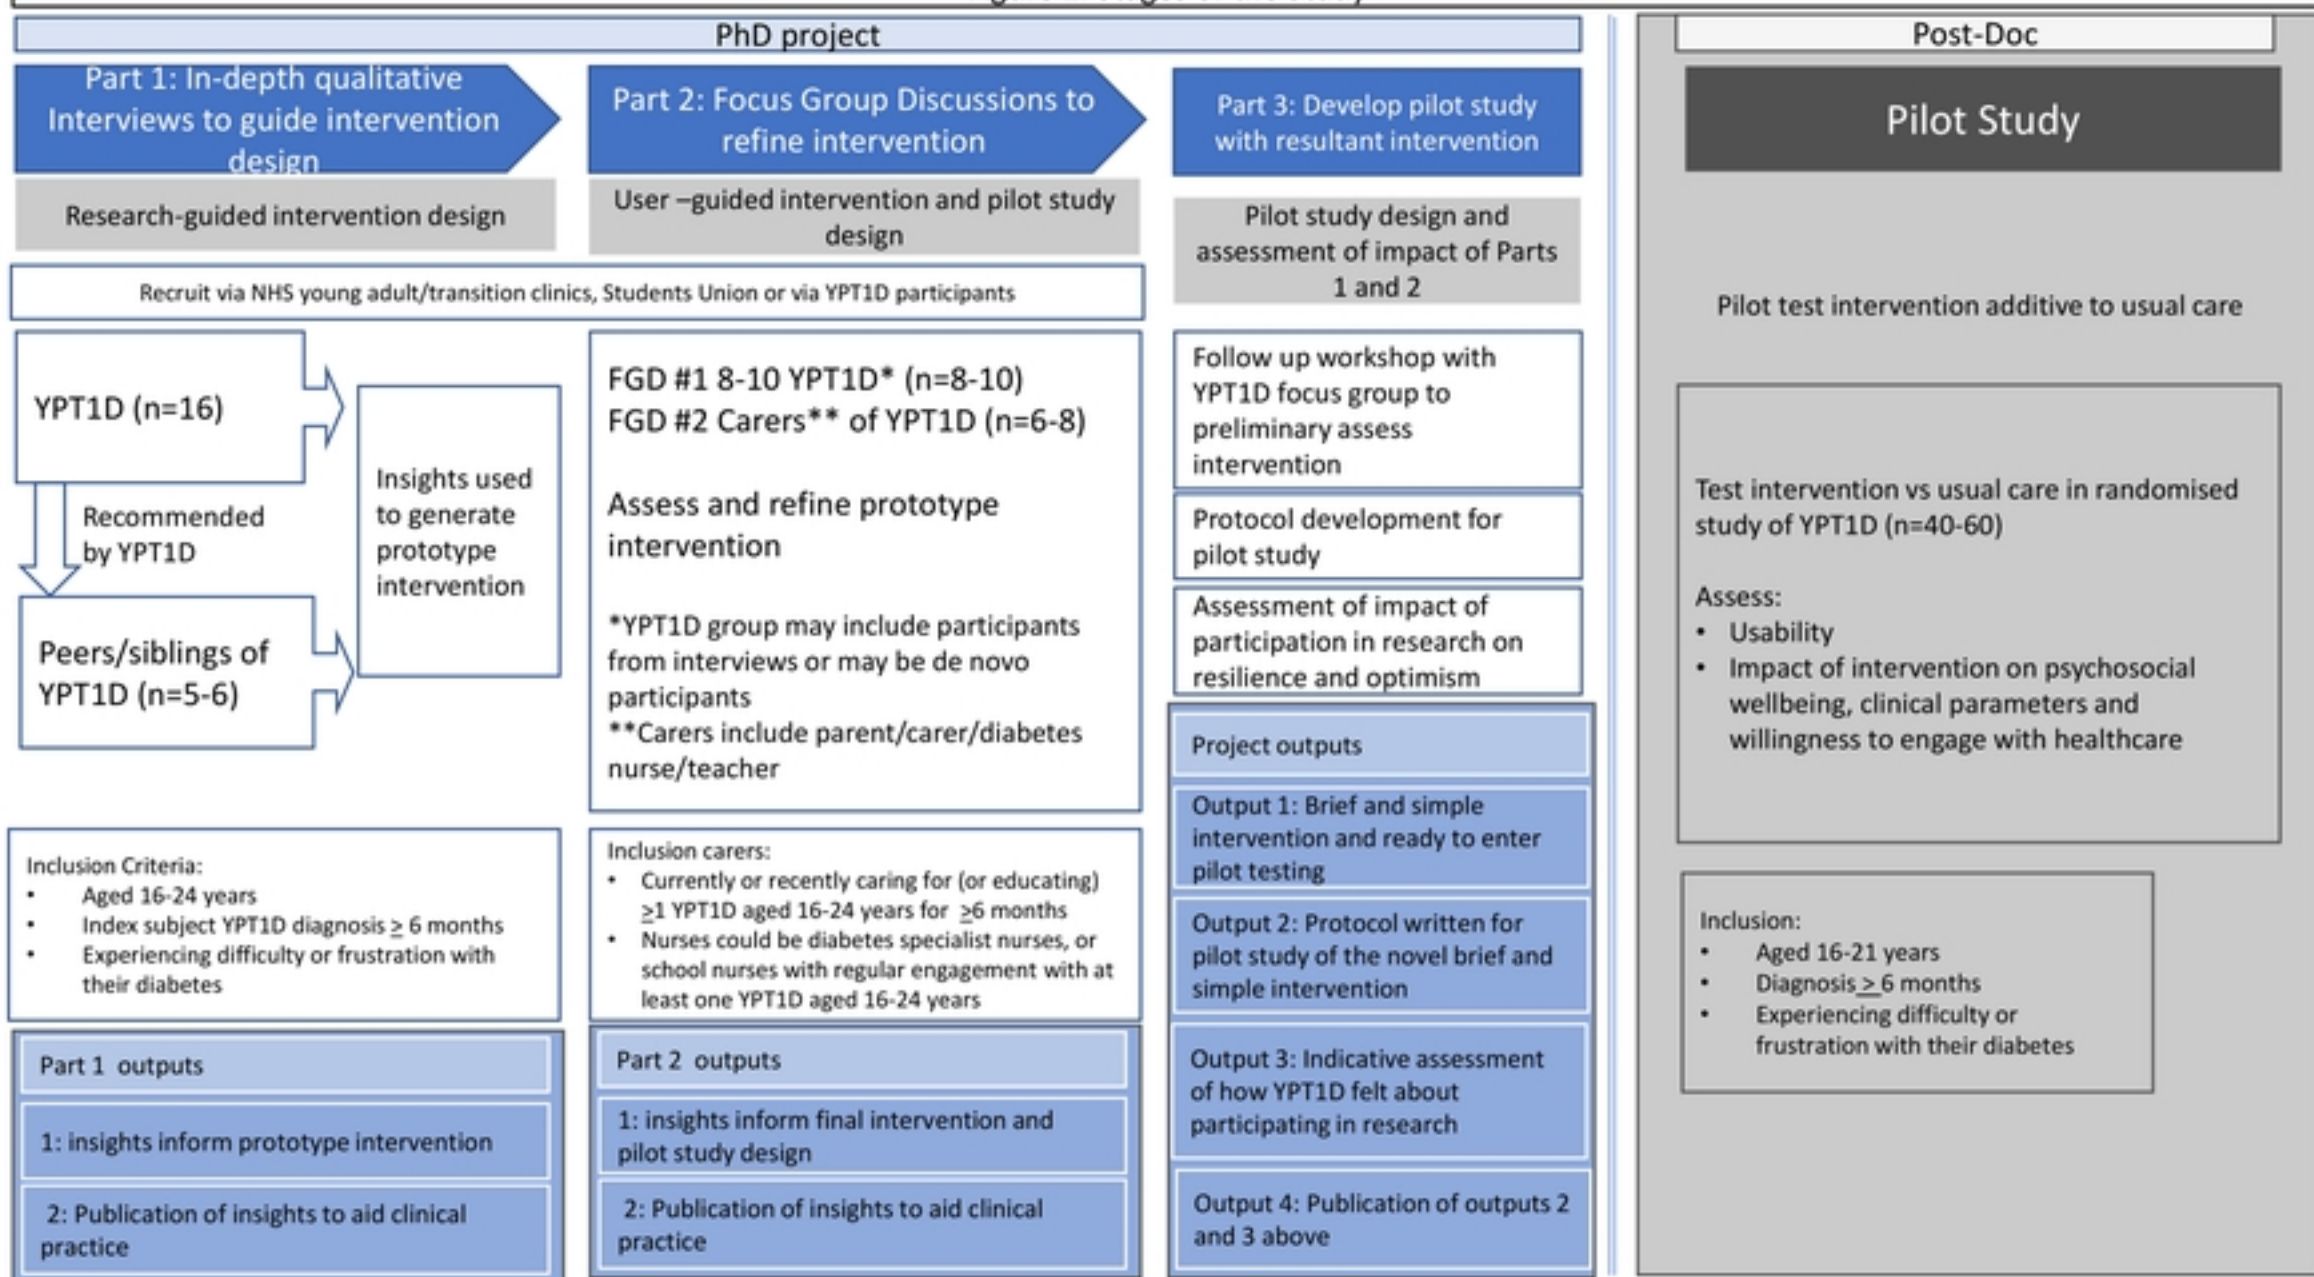

Figure 1

Figure 2: Inclusion and Exclusion Criteria

|                                  | Young people with Type 1 diabetes                                                                                                                                                                                                                                                                                                                                                                                                                                                                                                                                                       | Sibling, friends, peers                                                                                                                                                                                                                                                                                                                                                                                                                                          | Nurses, parents/carers, teachers                                                                                                                                                                                                                                                                                                                                                                                                                                                                                                                                    |
|----------------------------------|-----------------------------------------------------------------------------------------------------------------------------------------------------------------------------------------------------------------------------------------------------------------------------------------------------------------------------------------------------------------------------------------------------------------------------------------------------------------------------------------------------------------------------------------------------------------------------------------|------------------------------------------------------------------------------------------------------------------------------------------------------------------------------------------------------------------------------------------------------------------------------------------------------------------------------------------------------------------------------------------------------------------------------------------------------------------|---------------------------------------------------------------------------------------------------------------------------------------------------------------------------------------------------------------------------------------------------------------------------------------------------------------------------------------------------------------------------------------------------------------------------------------------------------------------------------------------------------------------------------------------------------------------|
| <b>Part 1 Inclusion criteria</b> | <ul style="list-style-type: none"> <li>• Aged 16-24 years at the time of interview and/or focus group discussion</li> <li>• Diagnosis of T1D &gt;6 months prior to interview and/or focus group discussion</li> <li>• Under the care of a diabetes health professional or team (whether paediatrics, transition, young adult clinic)</li> <li>• Self-identify as experiencing difficulty or frustration with their diabetes</li> <li>• Ability to speak and understand English and read written English</li> <li>• Willing to discuss living with diabetes with a researcher</li> </ul> | <ul style="list-style-type: none"> <li>• Sibling/friend of someone with T1D (Sibling/friends may still participate if the YPT1D participant withdraws or declines to be interviewed)</li> <li>• Aged <math>\geq 16</math> years</li> <li>• Referred to researcher by a YPT1D participant</li> <li>• Willing to discuss the YPT1D participant's diabetes with a researcher</li> <li>• Ability to speak and understand English and read written English</li> </ul> | Not applicable - not participating in Part 1                                                                                                                                                                                                                                                                                                                                                                                                                                                                                                                        |
| <b>Part 1 Exclusion criteria</b> | <ul style="list-style-type: none"> <li>• People with Type 2 diabetes (where the pathophysiology and associated drivers of stigma and self-efficacy are significantly different)</li> <li>• People with co-morbid chronic conditions that require medication (to retain the focus on T1D management)</li> </ul>                                                                                                                                                                                                                                                                          | <ul style="list-style-type: none"> <li>• No specific exclusion criteria</li> </ul>                                                                                                                                                                                                                                                                                                                                                                               |                                                                                                                                                                                                                                                                                                                                                                                                                                                                                                                                                                     |
| <b>Part 2 Inclusion criteria</b> | As for part 1 above                                                                                                                                                                                                                                                                                                                                                                                                                                                                                                                                                                     | Not applicable - not participating in Part 1                                                                                                                                                                                                                                                                                                                                                                                                                     | <ul style="list-style-type: none"> <li>• Currently or recently caring for (or educating) <math>\geq 1</math> young person aged 16-21 years with T1D with at least 6 months of experience</li> <li>• Nurses could be diabetes specialist nurses, or school nurses with regular engagement with at least one YPT1D aged <math>\geq 16</math> years</li> <li>• Willing to discuss their experiences of supporting a young person with type 1 diabetes with a researcher in a FGD setting</li> <li>• Ability to speak English and understand written English</li> </ul> |
| <b>Part 2 Exclusion criteria</b> |                                                                                                                                                                                                                                                                                                                                                                                                                                                                                                                                                                                         |                                                                                                                                                                                                                                                                                                                                                                                                                                                                  | <ul style="list-style-type: none"> <li>• No specific exclusion criteria</li> </ul>                                                                                                                                                                                                                                                                                                                                                                                                                                                                                  |

medRxiv preprint doi: <https://doi.org/10.1101/2023.04.20.23288856>; this version posted April 21, 2023. The copyright holder for this preprint (which was not certified by peer review) is the author/funder, who has granted medRxiv a license to display the preprint in perpetuity. It is made available under a [CC-BY 4.0 International license](https://creativecommons.org/licenses/by/4.0/).
